# Supplementary material for: Morphology and chirality controlled self-assembled nanostructures of porphyrin–pentapeptide conjugate: effect of the peptide secondary conformation
Source: Royal Society of Chemistry journal article supplement (doi:10.1039/c1jm10547g), 2011-01-01
Supplement: c1jm10547g.pdf [file c1jm10547g.pdf]

## **Supporting Information**

### **Morphology and Chirality Controlled Self-assembled Nanostructures of Porphyrin-pentapeptide Conjugate: Effect of the Peptide Secondary Conformation**

Quanbo Wang, Yanli Chen, Pan Ma, Jitao Lu, Xiaomei Zhang,\* and Jianzhuang  
Jiang\*

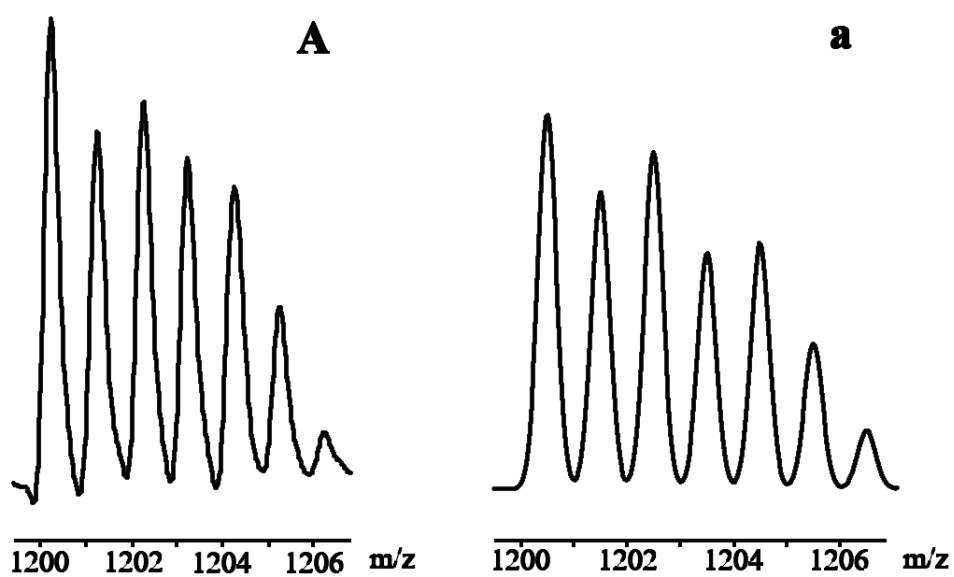

**Figure S1.** (A) Experimental and (a) simulated isotopic patterns for the molecular ion of porphyrin-pentapeptide conjugate **1**.

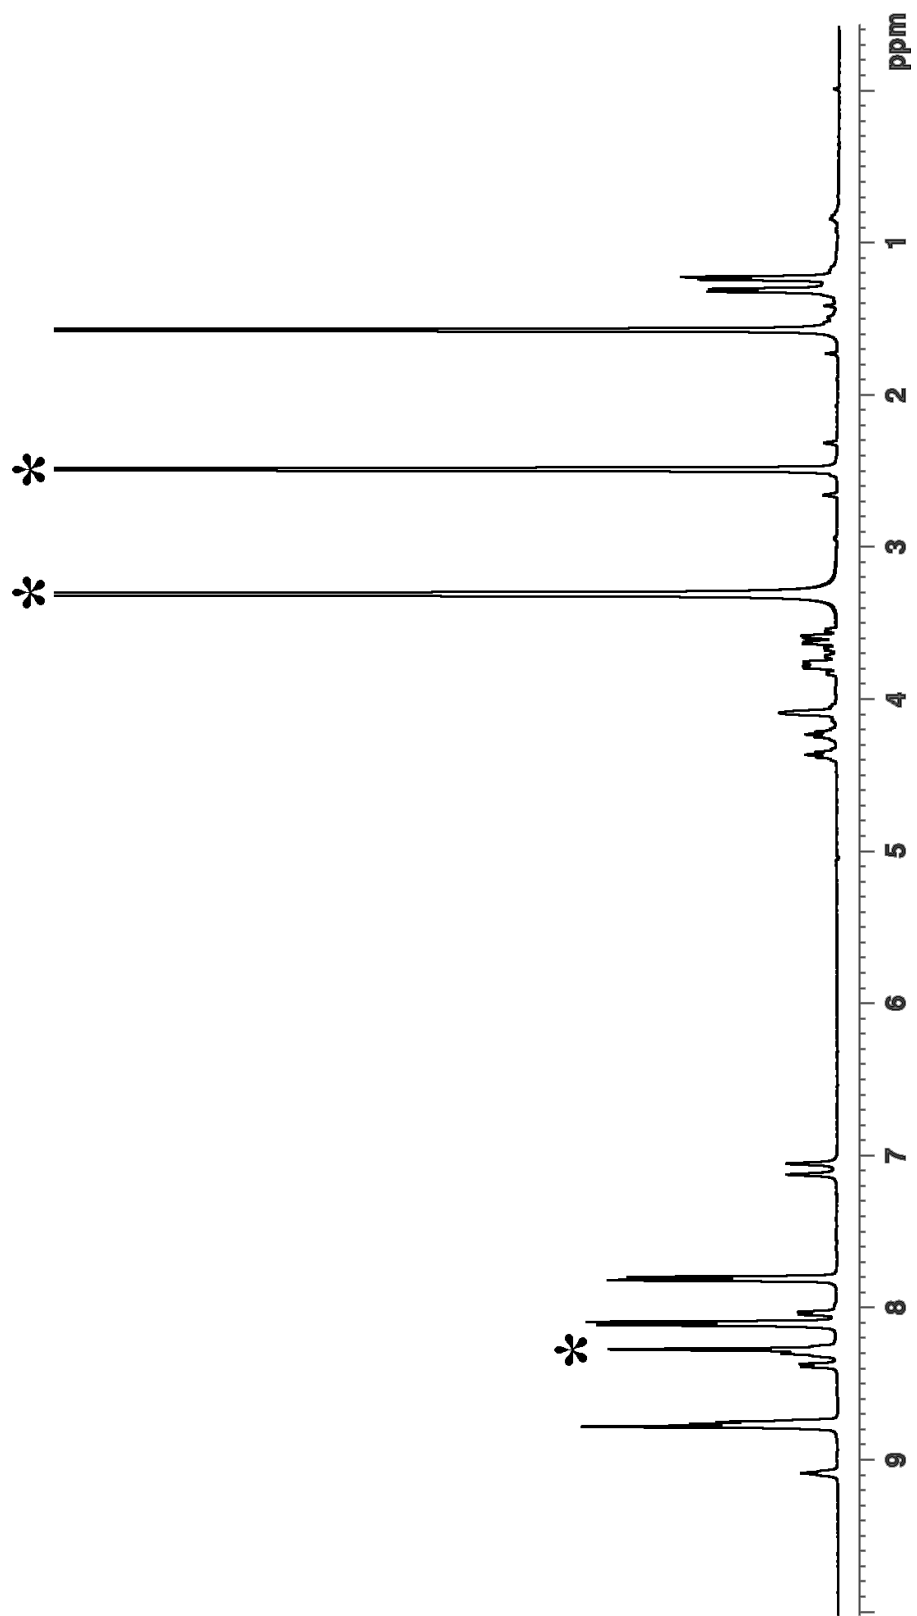

**Figure S2.**  $^1\text{H}$  NMR spectra of porphyrin-pentapeptide conjugate **1** in  $\text{d}_6$ -DMSO. \* indicates solvent impurities.

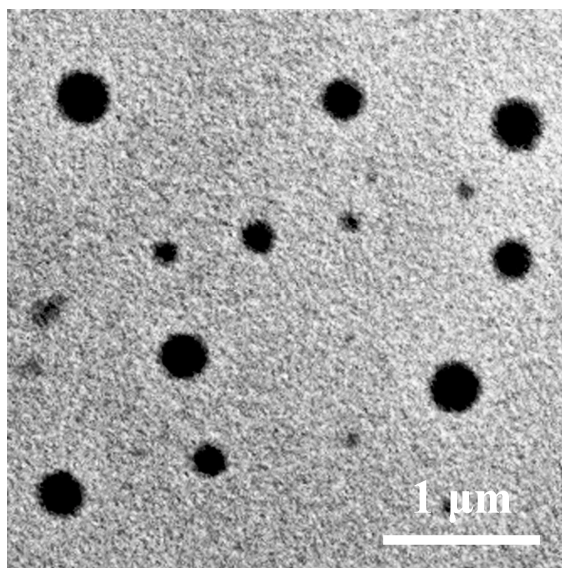

**Figure S3.** Nanoparticles fabricated from Zn[T(COOH)PP] in THF/*n*-hexane solution (1:3) observed by TEM.

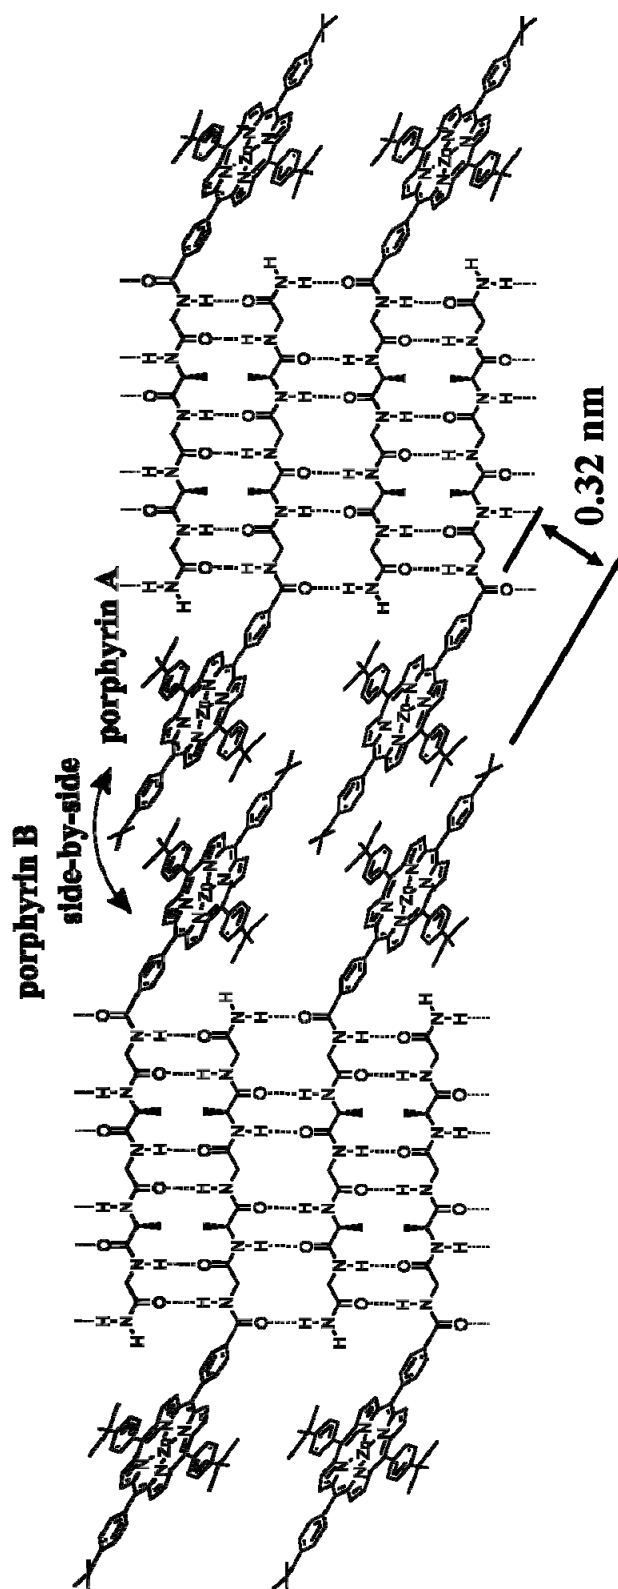

**Figure S4.** Schematic representation of two one-dimensional supramolecular chains in the nanotubes fabricated from conjugate **1** in THF/water solution (1:3).

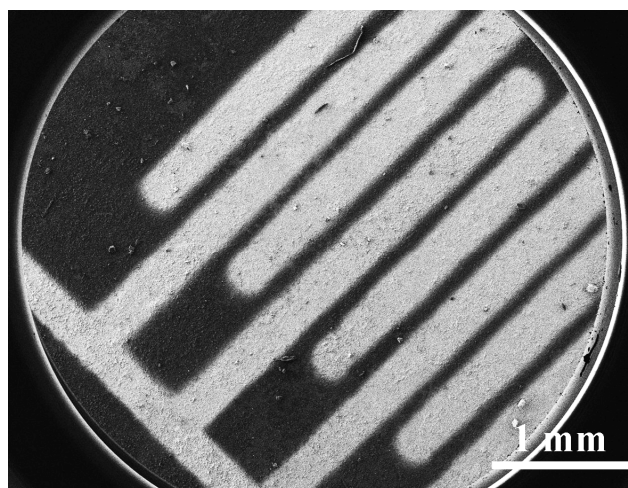

**Figure S5.** SEM image of two-electrode device fabricated on SiO<sub>2</sub>.

**Table S1.** Electronic absorption data of porphyrin-pentapeptide conjugate **1** in THF and its aggregates dispersed in *n*-hexane and water.

| Compound | $\lambda_{\text{max}} / \text{nm}$ |                    |                         |
|----------|------------------------------------|--------------------|-------------------------|
|          | THF                                | <i>n</i> -hexane   | water                   |
| <b>1</b> | 419, 504, 545, 582                 | 439, 505, 546, 583 | 395, 443, 510, 554, 587 |
